# Supplementary material for: What are ventilation defects in asthma?
Source: HighWire-hosted journal article supplement (doi:10.1136/thoraxjnl-2013-203711), 2013-08-16
Supplement: thoraxjnl-2013-203711supp_table.pdf [file thoraxjnl-2013-203711supp_table.pdf]

**Supplemental Table 1.** Subject listing of demographic characteristics, pulmonary function and dyspnea

| Subject                                 | Age<br>(yrs) | Gender | FEV <sub>1</sub><br>(% <sub>pred</sub> ) | FVC<br>(% <sub>pred</sub> ) | FEV <sub>1</sub> /FVC<br>(%) | IC<br>(% <sub>pred</sub> ) | RV<br>(% <sub>pred</sub> ) | TLC<br>(% <sub>pred</sub> ) | sRaw<br>(cmH <sub>2</sub> O·s) | FeNO<br>(ppb) | PC <sub>20</sub><br>(mg/ml) | mMRC     | Borg<br>Baseline | Borg<br>Post-MCh |
|-----------------------------------------|--------------|--------|------------------------------------------|-----------------------------|------------------------------|----------------------------|----------------------------|-----------------------------|--------------------------------|---------------|-----------------------------|----------|------------------|------------------|
| <b>Healthy Volunteers (n=8)</b>         |              |        |                                          |                             |                              |                            |                            |                             |                                |               |                             |          |                  |                  |
| 021                                     | 27           | F      | 105                                      | 105                         | 85                           | 124                        | 107                        | 113                         | 2.60                           | 18            | 8.5                         | 0        | 0                | 0.0              |
| 023                                     | 39           | M      | 86                                       | 95                          | 72                           | 125                        | 182                        | 118                         | 2.77                           | -             | 54.4                        | 0        | 0                | 0.0              |
| 027                                     | 24           | M      | 108                                      | 110                         | 80                           | 113                        | 179                        | 121                         | 4.00                           | -             | -                           | 0        | 0.5              | 2.0              |
| 030                                     | 50           | F      | 106                                      | 107                         | 79                           | 134                        | 75                         | 110                         | 3.08                           | -             | -                           | 0        | 0                | 2.0              |
| 031                                     | 26           | F      | 97                                       | 90                          | 93                           | 99                         | 109                        | 96                          | 3.24                           | -             | 46.1                        | 0        | 0                | 0.5              |
| 033                                     | 23           | M      | 93                                       | 91                          | 85                           | 110                        | 99                         | 99                          | 2.18                           | -             | 52.6                        | 0        | 0                | 0.0              |
| 034                                     | 30           | M      | 101                                      | 108                         | 77                           | 111                        | 102                        | 109                         | 2.81                           | -             | 49.9                        | 0        | 0                | 0.5              |
| 035                                     | 50           | F      | 117                                      | 118                         | 79                           | 126                        | 88                         | 115                         | 3.01                           | -             | -                           | 0        | 0                | 0.5              |
| Mean(±SD)                               | 34(11)       | -      | 102(10)                                  | 103(10)                     | 81(6)                        | 118(11)                    | 118(40)                    | 110(9)                      | 2.96(0.53)                     | -             | 42.3(19.2)                  | 0(0)     | 0.1(0.2)         | 0.7(0.8)         |
| <b>Asthmatics with No Defects (n=9)</b> |              |        |                                          |                             |                              |                            |                            |                             |                                |               |                             |          |                  |                  |
| 005                                     | 45           | F      | 78                                       | 87                          | 72                           | 124                        | 108                        | 102                         | 4.97                           | -             | 2.4                         | 2        | 0.5              | 4                |
| 006                                     | 23           | F      | 96                                       | 91                          | 92                           | 107                        | 104                        | 97                          | 1.50                           | 8             | 16.9                        | 1        | 1                | 7                |
| 007                                     | 24           | M      | 81                                       | 85                          | 81                           | 86                         | 111                        | 94                          | 3.22                           | 12            | 27.9                        | 0        | 0.5              | 3                |
| 008                                     | 34           | M      | 82                                       | 79                          | 84                           | 110                        | 105                        | 91                          | 2.67                           | 16            | 55.2                        | 0        | 0                | 3                |
| 010                                     | 30           | F      | 102                                      | 101                         | 87                           | 135                        | 82                         | 96                          | 2.25                           | 21            | 3.4                         | 1        | 0                | 2                |
| 017                                     | 23           | F      | 112                                      | 102                         | 96                           | 128                        | 164                        | 122                         | 3.95                           | 12            | 13.2                        | 0        | 0                | 3                |
| 018                                     | 22           | F      | 79                                       | 83                          | 82                           | 90                         | 115                        | 91                          | 5.58                           | 37            | 0.4                         | 0        | 0                | 3                |
| 020                                     | 23           | F      | 82                                       | 91                          | 79                           | 104                        | 69                         | 87                          | 3.80                           | 17            | 0.3                         | 1        | 0                | 2                |
| 024                                     | 20           | F      | 108                                      | 110                         | 86                           | 138                        | 85                         | 99                          | 2.88                           | 10            | 9.1                         | 1        | 0                | 4                |
| Mean(±SD)                               | 27(8)        | -      | 91(13)                                   | 92(10)                      | 84(7)                        | 114(18)                    | 105(25)                    | 98(10)                      | 3.42(1.22)                     | 17(9)         | 14.3(16.8)                  | 0.7(0.7) | 0.2(0.3)         | 3.4(1.4)         |
| <b>Asthmatics with Defects (n=17)</b>   |              |        |                                          |                             |                              |                            |                            |                             |                                |               |                             |          |                  |                  |
| 001                                     | 49           | F      | 69                                       | 94                          | 59                           | 116                        | 144                        | 110                         | 10.20                          | 38            | 0.08                        | 0        | 1                | 1                |
| 002                                     | 30           | M      | 96                                       | 105                         | 75                           | 122                        | 108                        | 109                         | 5.11                           | -             | 0.2                         | 0        | 0                | 4                |
| 003                                     | 29           | M      | 81                                       | 100                         | 66                           | 118                        | 115                        | 111                         | 19.50                          | 114           | 0.1                         | 1        | 0.5              | 3                |
| 004                                     | 49           | F      | 59                                       | 75                          | 63                           | 84                         | 130                        | 96                          | -                              | -             | 0.07                        | 0        | 0                | 2                |
| 011                                     | 23           | F      | 98                                       | 93                          | 91                           | 101                        | 113                        | 95                          | 2.93                           | 116           | 0.2                         | 1        | 1                | 3                |
| 012                                     | 25           | F      | 87                                       | 107                         | 69                           | 119                        | 98                         | 101                         | 5.36                           | 50            | 0.1                         | 1        | 0                | 3                |
| 013                                     | 37           | M      | 77                                       | 77                          | 81                           | 107                        | 135                        | 97                          | 10.42                          | 31            | 0.1                         | 4        | 1                | 3                |
| 014                                     | 29           | F      | 92                                       | 102                         | 77                           | 98                         | 96                         | 97                          | 2.64                           | 18            | 1.3                         | 1        | 1                | 3                |
| 015                                     | 47           | M      | 60                                       | 82                          | 57                           | 99                         | 115                        | 94                          | 6.51                           | 45            | 0.3                         | 0        | 0.5              | 4                |
| 016                                     | 53           | M      | 104                                      | 104                         | 77                           | 111                        | 82                         | 100                         | 4.78                           | 22            | 16.3                        | 0        | 0                | 4                |
| 019                                     | 42           | M      | 72                                       | 88                          | 65                           | 110                        | 144                        | 108                         | 13.85                          | 40            | 0.1                         | 1        | 0                | 1                |
| 022                                     | 24           | F      | 99                                       | 111                         | 76                           | 132                        | 90                         | 108                         | 6.40                           | 187           | 0.2                         | 0        | 0                | 3                |
| 025                                     | 58           | M      | 73                                       | 99                          | 56                           | 91                         | 121                        | 110                         | 8.38                           | 29            | 1.0                         | 0        | 0.5              | 0                |
| 026                                     | 37           | M      | 93                                       | 93                          | 66                           | 105                        | 107                        | 109                         | 4.33                           | -             | 2.6                         | 1        | 0.5              | 3                |
| 028                                     | 36           | F      | 66                                       | 92                          | 59                           | 129                        | 165                        | 113                         | 15.74                          | -             | 0.8                         | 1        | 3                | 3                |
| 029                                     | 41           | M      | 75                                       | 95                          | 63                           | 114                        | 136                        | 106                         | 13.76                          | 69            | 0.1                         | 1        | 2                | 3                |
| 032                                     | 49           | M      | 69                                       | 77                          | 70                           | 98                         | 98                         | 87                          | 6.31                           | 23            | 1.0                         | 1        | 0.5              | 3                |
| Mean(±SD)                               | 39(11)       | -      | 81(14)                                   | 94(11)                      | 69(10)                       | 109(13)                    | 117(22)                    | 103(8)                      | 8.51(4.95)                     | 60(50)        | 1.4(3.9)                    | 0.8(1.0) | 0.7(0.8)         | 2.7(1.1)         |

SD=Standard Deviation, FEV<sub>1</sub>=Forced Expiratory Volume in 1s, %<sub>pred</sub>= Percent Predicted, FVC=Forced Vital Capacity, IC=Inspiratory Capacity, RV=Residual Volume, TLC=Total Lung Capacity, sRaw=Specific Airway Resistance, FeNO=Fraction of Exhaled Nitric Oxide, PC<sub>20</sub>=provocative concentration of methacholine sufficient to induce a 20% decrease in FEV<sub>1</sub>, mMRC=modified Medical Research Council.
